## ***Insensitivity of P-Type Calcium Channels to Inhalational and Intravenous General Anesthetics***

A. C. Hall, Ph.D.,\* W. R. Lieb, Ph.D.,† N. P. Franks, Ph.D.‡

**Background:** Voltage-gated  $\text{Ca}^{2+}$  channels long have been considered plausible targets for general anesthetics. Previous anesthetic studies have focused on L-, T-, or N-type channels, but there have been no studies on channels identified as P-type. Since P-type channels may be the most important voltage-gated  $\text{Ca}^{2+}$  channels involved in synaptic transmission in mammalian brain, it is important to establish their sensitivity to clinically relevant concentrations of general anesthetics.

**Methods:** Acutely dissociated cerebellar Purkinje neurons were obtained from 7-14-day-old Sprague-Dawley rats. P-type currents were measured using the whole-cell version of the patch-clamp technique, with  $\text{Ba}^{2+}$  as the current carrier. General anesthetics were applied to the neurons in aqueous solution at room temperature (20-23°C).

**Results:** P-type  $\text{Ca}^{2+}$  channels were found to be very insensitive to a variety of general anesthetics and ethanol. Inhibitions of less than 10% were produced by 0.35 mM halothane, 0.35 mM isoflurane, 32  $\mu\text{M}$  thiopental, 50  $\mu\text{M}$  pentobarbital, 2  $\mu\text{M}$  propofol, and 200 mM ethanol. Substantial anesthetic inhibition was found only at free aqueous concentrations much greater than those that are clinically relevant. For halothane, the dose-response curve showed an  $\text{IC}_{50}$  concentration of  $1.17 \pm 0.02$  mM and a Hill coefficient of  $2.02 \pm 0.04$  (mean  $\pm$  SEM).

**Conclusions:** The relatively small inhibitions of P-type  $\text{Ca}^{2+}$  channels produced by volatile and intravenous anesthetics at their free aqueous  $\text{EC}_{50}$  concentrations for general anesthesia

in mammals suggest that these channels do not play a major role in the induction of general anesthesia. (Key words: Anesthetics, intravenous: pentobarbital; propofol; thiopental. Anesthetics, volatile: halothane; isoflurane. Brain, cerebellar Purkinje neurons: P-type calcium channels. Ethanol.)

VOLTAGE-GATED  $\text{Ca}^{2+}$  channels in neuronal plasma membranes are intimately involved in signal transmission in the central nervous system. These channels represent, therefore, obvious and plausible targets for general anesthetics. However, it recently became clear that there are many different types of voltage-gated  $\text{Ca}^{2+}$  channels. On the basis of their electrical and pharmacologic properties, a convenient classification<sup>1-4</sup> (which is undoubtedly oversimplified) groups them into four types: T, L, N, and P. While T- and L-type channels are present in a wide variety of neuronal and nonneuronal cells, N- and P-type channels have so far been found mainly in neurons.<sup>1-3</sup> Because of their ready accessibility (in cardiac cells, for example), most anesthetic studies to date have been on channels that appear to be of the T- and L-types.<sup>5-11</sup> Only a few anesthetic studies<sup>12,13</sup> have been performed on channels identified as N-type, whereas none have been conducted on channels identified as P-type, which are found throughout the nervous system and may be the major class of voltage-gated  $\text{Ca}^{2+}$  channel involved in synaptic transmission in the mammalian central nervous system.<sup>3,14</sup>

P-type channels get their name from their initial discovery in cerebellar Purkinje cells,<sup>15</sup> the type of central neuron used in the current investigation. Antibody labeling, however, shows that these channels are distributed widely in the mammalian central nervous system.<sup>16</sup> Based on inhibition by specific toxins of depolarization-induced  $\text{Ca}^{2+}$  uptake by rat brain synaptosomes, P channels appear to constitute as much as 80% of the voltage-gated  $\text{Ca}^{2+}$  channels in mammalian brain nerve terminals.<sup>3,17,18</sup> Furthermore, the specific P-channel blocker  $\omega$ -Aga-IVA has been shown to inhibit by more than 80% excitatory postsynaptic currents in hippocampal neurons and inhibitory postsyn-

This article is accompanied by an editorial. Please see: Lynch C III, Pancrazio JJ: Snails, spiders, and stereospecificity—is there a role for calcium channels in anesthetic mechanisms? ANESTHESIOLOGY 81:1-5, 1994.

\* Research Assistant.

† Research Fellow.

‡ Professor of Biophysics.

Received from the Biophysics Section, The Blackett Laboratory, Imperial College of Science, Technology and Medicine, London, United Kingdom. Accepted for publication April 8, 1994. Supported by grants from the Medical Research Council and the BOC Group Inc.

Address reprint requests to any of the authors: Biophysics Section, The Blackett Laboratory, Imperial College of Science, Technology and Medicine, Prince Consort Road, London SW7 2BZ, United Kingdom.

aptic currents in cerebellar and spinal neurons.<sup>14</sup> Therefore, it is important for our understanding of anesthetic mechanisms to determine the sensitivity of P-type  $\text{Ca}^{2+}$  channels to clinically relevant concentrations of various classes of general anesthetic agents.

In the current study, we investigated the effects on voltage-gated P-type  $\text{Ca}^{2+}$  channels of four clinically used general anesthetics (halothane, isoflurane, propofol, and thiopental), a barbiturate often used in experimental studies (pentobarbital), and the nontherapeutic drug ethanol.

## Materials and Methods

### Animals

Sprague-Dawley rats (7–14 days old) were used and handled in compliance with U.K. regulations.

### Preparation of Cerebellar Purkinje Cells

The vermis of the cerebellum was dissected from decapitated rats and cut into chunks ( $\sim 1 \text{ mm}^3$ ). Cells were dissociated using the solutions and enzymes described by Mintz *et al.*<sup>19</sup> Briefly, the chunks of vermis were incubated for 7–8 min under an oxygen atmosphere at  $37^\circ\text{C}$  in 82 mM  $\text{Na}_2\text{SO}_4$ , 30 mM  $\text{K}_2\text{SO}_4$ , 5 mM  $\text{MgCl}_2$ , 2 mM HEPES, 10 mM glucose, and 0.001% phenyl red indicator (titrated to pH 7.4 with NaOH) containing 3 mg/ml protease (type XXIII). The protease solution was decanted and the tissue suspended in 82 mM  $\text{Na}_2\text{SO}_4$ , 30 mM  $\text{K}_2\text{SO}_4$ , 5 mM  $\text{MgCl}_2$ , 10 mM HEPES, 10 mM glucose, and 0.001% phenyl red indicator (titrated to pH 7.4 with NaOH) containing 1 mg/ml trypsin inhibitor (type II-O, chicken egg white) and 1 mg/ml bovine serum albumin (fraction V) at  $37^\circ\text{C}$ , and then left to cool to room temperature ( $20\text{--}23^\circ\text{C}$ ) under an oxygen atmosphere. A few chunks were withdrawn and gently triturated by 10–15 passages through the tip of a fire-polished Pasteur pipette, and the cell suspension was deposited uniformly in a glass-bottomed recording bath (bath volume  $\sim 100 \mu\text{l}$ ) containing Tyrode solution: 150 mM NaCl, 4 mM KCl, 2 mM  $\text{CaCl}_2$ , 2 mM  $\text{MgCl}_2$ , 10 mM glucose, and 10 mM HEPES (titrated to pH 7.4 with NaOH). Most of the cells adhered to the glass within 5–10 min, and the Purkinje neurons were identified easily by their comparatively large size ( $15\text{--}25 \mu\text{m}$  diameter) and their distinctive dendritic stump (identification was confirmed by staining with propidium iodide<sup>20</sup> in separate experiments). After the cells had adhered, they were

continually superfused ( $\sim 1 \text{ ml/min}$ ) with Tyrode solution until patch formation (see below). After each recording, the bath was cleaned and a fresh aliquot of cells added. Cells were used within 4 h of dissection. All chemicals, unless otherwise stated, were obtained from Sigma Chemical Co. (Poole, Dorset, United Kingdom).

### Recording Technique

P-type  $\text{Ca}^{2+}$  channel currents were recorded using the standard whole-cell voltage-clamp technique.<sup>21</sup> Pipettes were fabricated from thin-walled filamented borosilicate glass (GC150TF, Clark Electromedical Instruments, Reading, Berkshire, United Kingdom) using a two-stage pull (Narishige PB-7 micropipette puller, Tokyo, Japan), fire-polished and filled with 108 mM cesium methanesulfonate, 4 mM  $\text{MgCl}_2$ , 9 mM EGTA, 9 mM HEPES, 4 mM Mg-ATP, 14 mM phosphocreatine (Tris salt), and 1 mM Tris-GTP (titrated to pH 7.4 with CsOH). Typical electrode resistances were 5–10 M $\Omega$ . Upon establishing the whole-cell configuration, the cells were routinely voltage-clamped at  $-84 \text{ mV}$ . The Tyrode solution was exchanged for the  $\text{Ba}^{2+}$  recording solution: 5 mM  $\text{BaCl}_2$ , 160 mM TEA-Cl, 0.1 mM EGTA, and 10 mM HEPES (titrated to pH 7.4 with TEA-OH). These solutions were designed to eliminate  $\text{Na}^+$  and  $\text{K}^+$  currents and to isolate currents through  $\text{Ca}^{2+}$  channels, using  $\text{Ba}^{2+}$  ions as the current carrier. ( $\text{Ba}^{2+}$  often is used in place of  $\text{Ca}^{2+}$  to eliminate  $\text{Ca}^{2+}$ -dependent inactivation, minimize second-messenger effects, prevent activation of  $\text{Ca}^{2+}$ -activated  $\text{K}^+$  currents, and/or to increase the magnitude of the evoked currents.) Inward currents were recruited by 60-ms voltage steps to (typically)  $-25 \text{ mV}$  delivered every 20 s. Consecutive current records were observed to increase during the initial few minutes, presumably because of exchange of the intracellular medium with the pipette solution. Subsequent records generally reached a consistent level, with current rundown being minimal during the time-course of an experiment. All current traces were corrected for small leak components, calculated from the currents observed during 10-mV hyperpolarizing pulses. Inhibitions were monitored by evoking currents every 20 s, and percentage inhibition was calculated from the steady-state block achieved after adequate ( $\sim 1 \text{ min}$ ) exposure to anesthetic solutions. Inhibitions almost always were reversed upon washout; data from the rare instances of irreversibility were excluded from analysis. All experiments were performed at room temperature ( $20\text{--}23^\circ\text{C}$ ). Currents

## CALCIUM CHANNELS AND GENERAL ANESTHETICS

were filtered at 1 kHz ( $-3$  dB, 8-pole Bessel filter) and sampled at 4 kHz. All voltages have been compensated for series resistance and corrected for a liquid junction potential of  $-4$  mV between the pipette and the  $\text{Ba}^{2+}$  recording solution.  $\text{Ca}^{2+}$  channel currents were identified as P-type using synthetic  $\omega$ -Aga-IVA (Peptides International, Louisville, KY). The synthetic toxin has been shown<sup>22</sup> to have the same high degree of selectivity as the native toxin purified from the funnel-web spider *Agelenopsis aperta*. The toxin was dissolved with 1 mg/ml cytochrome C (from horse heart; Sigma) to minimize nonspecific binding.

### Anesthetic Solutions

Anesthetics were dissolved in the  $\text{Ba}^{2+}$  recording solution. The volatile agents halothane (ICI, Macclesfield, Cheshire, United Kingdom) and isoflurane (Abbott, Queenborough, Kent, United Kingdom) were diluted from saturated solutions (halothane 17.5 mM,<sup>23</sup> isoflurane 15.3 mM<sup>24</sup>). Thiopental (formulated as Intraval: 92% thiopental, 8%  $\text{Na}_2\text{CO}_3$ ; May and Baker, Dagenham, Essex, United Kingdom), ethanol (BDH, Poole, Dorset, United Kingdom), and sodium pentobarbital (Sigma) were weighed out and dissolved. Propofol (supplied as pure 2,6-diisopropylphenol by Zeneca, Macclesfield, Cheshire, United Kingdom) was made up to 10 mM in ethanol before dilution in the recording solution. The 2- $\mu\text{M}$  propofol solution therefore contained a final concentration of ethanol of 3.4 mM. This ethanol concentration did not cause any significant current inhibition. Nonetheless, in the experiments with propofol, the control recording solutions also contained 3.4 mM ethanol. Cells were continuously superfused ( $\sim 1$  ml/min) throughout the experiment; losses of volatile agents from the perfusion system were found to be negligible as measured by gas chromatography.

### Anesthetic Concentrations

All anesthetic concentrations in this paper are expressed as free concentrations in aqueous solution. To discuss the results of our *in vitro* experiments in the context of anesthetic mechanisms, it is essential to use anesthetic concentrations that are close to free aqueous concentrations present during surgical general anesthesia. For halothane and isoflurane, the free aqueous concentrations at minimum alveolar concentration (lack of response to a painful stimulus) are, on average, about 0.25 mM and 0.32 mM, respectively, for a variety of mammals, including humans.<sup>25</sup> Although minimum alveolar concentration values for halothane and isoflu-

rane expressed as partial pressures decrease markedly with temperature,<sup>25,26</sup> there is a compensating, but slightly smaller, increase in water/gas partition coefficients.<sup>25</sup> Consequently, when expressed as aqueous concentrations, minimum alveolar concentration values change relatively little with temperature. The values used here are for 37°C, but are reasonable approximations for *in vitro* experiments at room temperature.<sup>25</sup> They are close to the  $\text{EC}_{50}$  concentrations needed to induce anesthesia in tadpoles at room temperature (0.23 mM halothane<sup>27</sup> and 0.29 mM isoflurane<sup>28</sup>). For intravenous agents, complications arise from their relatively rapid redistribution and metabolism, and explicit account must be taken of their (often) tight binding to plasma proteins and blood constituents. (For example, about 98% of plasma propofol is bound to protein,<sup>29</sup> so that the free aqueous concentration of propofol is only about 2% of the total plasma concentration.) Recent estimates of the free aqueous  $\text{EC}_{50}$  concentrations for general anesthesia in mammals (lack of response to a painful stimulus) are 25  $\mu\text{M}$  thiopental, 50  $\mu\text{M}$  pentobarbital, and 0.4  $\mu\text{M}$  propofol.<sup>30</sup> (In our experiments, to test the sensitivity of P-type  $\text{Ca}^{2+}$  channels, we used 32–100  $\mu\text{M}$  thiopental, 50  $\mu\text{M}$  pentobarbital, and 2  $\mu\text{M}$  propofol.) Whereas the values for the inhalational agents are reasonably precise, the  $\text{EC}_{50}$  concentrations for the intravenous anesthetics are less secure because of their complex pharmacokinetics.

## Results

$\text{Ca}^{2+}$  channel currents (1–6 nA) were readily evoked from cerebellar Purkinje neurons by stepping the membrane potential from a holding value of  $-84$  mV to voltages more positive than  $-50$  mV. Control currents were fast activating (peak at  $\sim 5$  ms) and essentially noninactivating (less than 10% inactivation) during the time course (60 ms) of the test potential (figs. 1 and 2). The currents were completely blocked by 500  $\mu\text{M}$   $\text{Cd}^{2+}$  (not shown). More importantly, they were inhibited  $91 \pm 1\%$  (mean  $\pm$  SEM,  $n = 6$  cells) by 100 nM  $\omega$ -Aga-IVA (fig. 1), showing the currents to be almost entirely P-type.<sup>18,19,22</sup> The current-voltage curves (fig. 2) show that the maximum channel current was evoked at a test potential of about  $-25$  mV.

At a halothane concentration relevant to general anesthesia (0.35 mM  $\approx 1.4$  MAC, see materials and methods), the  $\text{Ca}^{2+}$  channel current was only slightly inhibited (table 1 and fig. 2 inset), and there was little

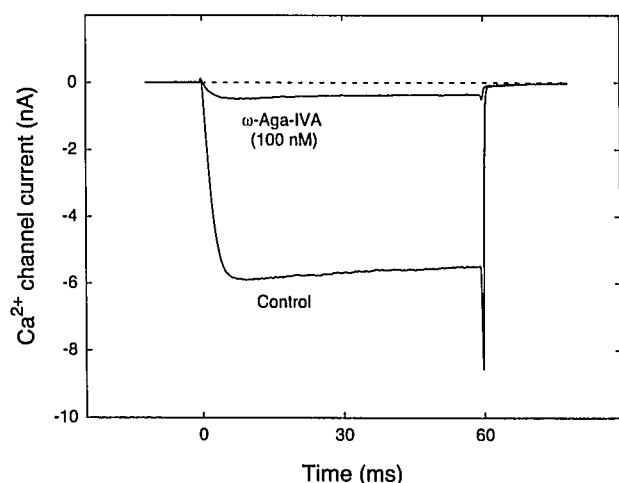

**Fig. 1.** P-type  $\text{Ca}^{2+}$  channel current from rat cerebellar Purkinje neurons. Currents through the channel were blocked ( $91 \pm 1\%$ , mean  $\pm$  SEM,  $n = 6$  cells) by 100 nM  $\omega$ -Aga-IVA. In this example, the current was elicited by a 60-ms depolarization to a test potential of  $-20$  mV. The dashed line indicates zero current. The spike after the end of each depolarization is a "tail current," which is caused by the increased driving force through the open  $\text{Ca}^{2+}$  channels that subsequently close rapidly after the return to the holding potential.

change in either the time-course of the current or the shape of the I-V curve (fig. 2). Only at much higher concentrations was there substantial inhibition of the

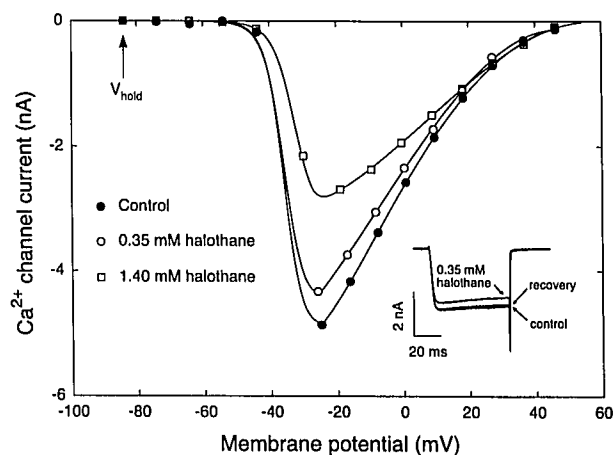

**Fig. 2.** Current-voltage curves for peak P-type  $\text{Ca}^{2+}$  channel currents in control saline ( $\bullet$ ) and in the presence of 0.35 mM ( $\circ$ ) and 1.40 mM ( $\square$ ) halothane.  $V_{\text{hold}}$  indicates the holding potential ( $-84$  mV). (Inset) Currents elicited by 60-ms depolarizations to  $-25$  mV, the standard test potential, in the presence and absence of 0.35 mM halothane ( $\sim 1.4$  MAC). Note the small inhibition of peak current and the recovery upon washout.

**Table 1.** Inhibition of P-type Calcium Channel Peak Currents by General Anesthetics and Ethanol

| Anesthetic Agent | Concentration | % Inhibition (mean $\pm$ SEM) | Cells (n) | EC <sub>50</sub> for General Anesthesia* |
|------------------|---------------|-------------------------------|-----------|------------------------------------------|
| Halothane        | 0.35 mM       | $8.1 \pm 1.6$                 | 7         | 0.25 mM                                  |
| Isflurane        | 0.35 mM       | $8.1 \pm 1.5$                 | 6         | 0.32 mM                                  |
| Thiopental       | 32 $\mu$ M    | $5.4 \pm 0.4$                 | 6         | 25 $\mu$ M                               |
| Thiopental       | 100 $\mu$ M   | $19.2 \pm 2.5$                | 5         | 25 $\mu$ M                               |
| Propofol         | 2 $\mu$ M     | $2.8 \pm 0.4$                 | 6         | 0.4 $\mu$ M                              |
| Pentobarbital    | 50 $\mu$ M    | $6.4 \pm 1.1$                 | 6         | 50 $\mu$ M                               |
| Ethanol          | 200 mM        | $4.7 \pm 1.9$                 | 5         | —                                        |

\* See materials and methods.

peak current, with somewhat more inactivation of the inhibited current ( $\sim 30\%$  at 1.40 mM halothane) during the voltage step (not shown).

The percentage inhibition of the current as a function of halothane concentration is shown in figure 3. The data were fitted (by the method of least-squares, with weights equal to the reciprocals of the squares of the standard errors) to a Hill equation of the form

$$y = c^b / (c^b + \text{IC}_{50}^b),$$

where  $y$  is the fractional inhibition,  $c$  is the halothane concentration, and  $b$  is the Hill coefficient. The best fit gave an  $\text{IC}_{50}$  (mean  $\pm$  SEM) of  $1.17 \pm 0.02$  mM halothane ( $>4$  times MAC) with  $b = 2.02 \pm 0.04$ .

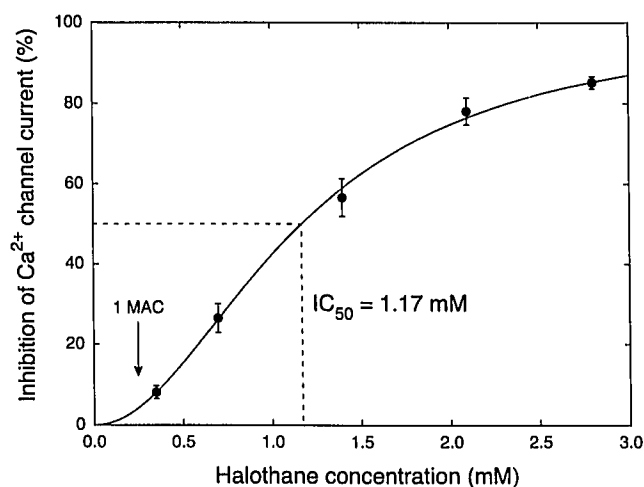

**Fig. 3.** Dose-response curve for the inhibition of the peak P-type  $\text{Ca}^{2+}$  channel current by halothane. The error bars represent the standard errors (for at least five cells). The solid line was calculated using a Hill equation with  $\text{IC}_{50}$  of 1.17 mM and a Hill coefficient ( $b$ ) of 2.02.

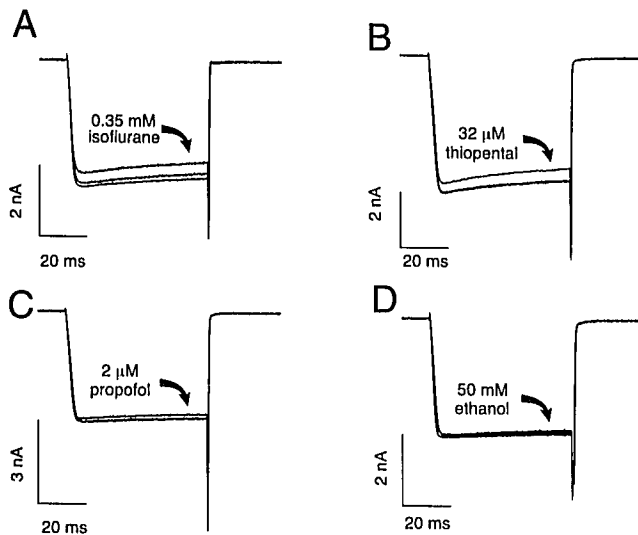

**Fig. 4.** The P-type  $\text{Ca}^{2+}$  channel current is very insensitive to a variety of clinical general anesthetics and ethanol. This figure shows representative data of the small inhibitions observed with (A) 0.35 mM isoflurane, (B) 32  $\mu\text{M}$  thiopental, (C) 2  $\mu\text{M}$  propofol, and (D) 50 mM ethanol. In each set, the inhibited current is shown with the control before application of the anesthetic (or ethanol) and the recovery after washout. See also table 1.

The P-type  $\text{Ca}^{2+}$  channel current was also remarkably insensitive (fig. 4) to clinically relevant levels of other anesthetics, as well as to relatively high concentrations (up to 200 mM) of ethanol. These results are summarized in table 1.

## Discussion

Our major finding is that P-type voltage-gated  $\text{Ca}^{2+}$  channels in cerebellar Purkinje neurons are very insensitive to inhibition by surgically relevant concentrations of inhalational and intravenous general anesthetics (table 1). For the volatile anesthetics halothane and isoflurane, concentrations equivalent to about 1 MAC inhibited the peak current by less than 10%. The intravenous agents thiopental and propofol, at levels (32  $\mu\text{M}$  and 2  $\mu\text{M}$ , respectively) in excess of  $\text{EC}_{50}$  concentrations for a lack of response to a painful stimulus, produced even smaller inhibitions. For ethanol, a concentration of 50 mM, which causes numerous behavioral effects in humans, caused no measurable inhibition (fig. 4). Even a concentration as high as 200 mM, which usually would be lethal,<sup>31</sup> inhibited peak channel current by only about 5%.

The effects of halothane were studied further, over a range of higher concentrations. The halothane dose-response curve (fig. 3) showed that a concentration (1.17 mM) well in excess of the clinically relevant range was required to half-inhibit peak currents. The steepness of the dose-response curve (Hill coefficient  $\approx 2$ ) is consistent with the existence of more than one low-affinity binding site for halothane on the channel protein. Our observed halothane  $\text{IC}_{50}$  concentration for the P-type channel peak current falls within the range found in previous electrophysiologic studies of other (mainly L-type) high-voltage-activated  $\text{Ca}^{2+}$  channels. For example, Bosnjak *et al.*<sup>11</sup> determined an  $\text{IC}_{50}$  for halothane of  $\sim 0.75$  mM for inhibition of L-type currents in dog heart ventricular cells, and Terrar and Victory<sup>6</sup> reported that 1.57 mM halothane inhibited a largely L-type  $\text{Ca}^{2+}$  current in myocytes from guinea-pig ventricle by only  $\sim 33\%$ . Furthermore, L-type currents in dog cardiac Purkinje cells would be inhibited by  $\sim 50\%$  at 0.70 mM halothane.<sup>8</sup> Finally, Herrington *et al.*<sup>9</sup> measured a halothane  $\text{IC}_{50}$  of 0.85 mM for L-like currents in clonal  $\text{GH}_3$  pituitary cells, and Takenoshita and Steinbach<sup>10</sup> found  $\text{IC}_{50}$  of 1.5 mM halothane for an unclassified high-voltage-activated  $\text{Ca}^{2+}$  current in rat dorsal root ganglion cells. Similar insensitivity has been found for the effects of isoflurane,<sup>5,8,11</sup> in line with our observations (table 1) at 0.35 mM isoflurane ( $\sim \text{EC}_{50}$  for general anesthesia). It thus appears that P-type channels are not alone among high-voltage-activated channels in being insensitive to volatile general anesthetics.

We also found that P-type  $\text{Ca}^{2+}$  channels were relatively insensitive to the intravenous anesthetics propofol, thiopental, and pentobarbital (table 1). This is consistent with most previous studies on other voltage-gated  $\text{Ca}^{2+}$  channels. Puttick and Terrar<sup>32</sup> found that  $\text{IC}_{50} \approx 100$   $\mu\text{M}$  propofol (more than 2 orders of magnitude above the  $\text{EC}_{50}$  for general anesthesia) for inhibition of L-like  $\text{Ca}^{2+}$  current in guinea-pig ventricular myocytes. Little work on  $\text{Ca}^{2+}$  currents has been carried out using thiopental, but other barbiturates have been shown to inhibit a number of voltage-gated  $\text{Ca}^{2+}$  channels; however, once again, the  $\text{IC}_{50}$  concentrations are generally high.<sup>12,33,34</sup> For example, N-type  $\text{Ca}^{2+}$  channels expressed in *Xenopus* oocytes injected with human brain RNA were inhibited by pentobarbital with  $\text{IC}_{50}$  concentrations of  $\sim 1,000$   $\mu\text{M}$  for peak currents and 400  $\mu\text{M}$  for sustained currents.<sup>12</sup> Conversely, voltage-gated  $\text{Ca}^{2+}$  channels of unknown type(s) in guinea-pig hippocampal CA1 neurons have been reported<sup>35</sup> to

be exceptionally sensitive to pentobarbital ( $IC_{50} = 16 \mu M$  for peak currents).

Our use of  $Ba^{2+}$  as a current carrier rather than  $Ca^{2+}$  (for the reasons outlined in materials and methods) raises one possible caveat that should be addressed. When  $Ca^{2+}$  ions are used, a  $Ca^{2+}$ -dependent inactivation of the inward current is sometimes observed with  $Ca^{2+}$  channels<sup>36</sup>; anesthetics, in principle, could affect this process. It also has been observed with both halothane<sup>9</sup> and pentobarbital<sup>12,13</sup> that the responses following long depolarizations are somewhat more sensitive to anesthetic inhibition than the peak currents. However, voltage-gated  $Ca^{2+}$  channels present at synaptic nerve terminals (usually considered to be most relevant to general anesthesia) open only briefly ( $\sim$  a millisecond<sup>37</sup>) in response to depolarization by an invading action potential. Therefore, the peak, rather than sustained, currents are probably more important when considering mechanisms of general anesthesia.

The P-type channels we have studied in cerebellar Purkinje neurons may turn out to consist of a heterogeneous population of  $Ca^{2+}$  channels, and we cannot rule out the possibility that a small subpopulation has a higher sensitivity to anesthetics. In addition, anesthetic sensitivity might be different *in vivo* than in our acutely dissociated neurons, because of, for example, modulation of  $Ca^{2+}$  channel properties by neurotransmitters acting on second-messenger systems.<sup>38</sup> Furthermore, there have been isolated reports<sup>10,35</sup> of  $Ca^{2+}$  channels in other neurons being exceptionally sensitive to certain anesthetics. However, the bulk of the evidence available,<sup>25,30</sup> including the results of the current study, suggests that most  $Ca^{2+}$  channels (and voltage-gated channels in general) are relatively insensitive to inhibition by anesthetic  $EC_{50}$  concentrations that produce general anesthesia. We believe an opposite conclusion was drawn often in the past mainly because of the uncritical use of anesthetic concentrations much higher than the free aqueous  $EC_{50}$  concentrations for general anesthesia (table 1 and materials and methods).

It is conceivable that the small inhibitions of P-type  $Ca^{2+}$  channels we have observed at surgically relevant anesthetic concentrations might be amplified in some way (for example, there is a steep dependence of neurotransmitter release on  $Ca^{2+}$  entry at nerve terminals<sup>39</sup>) and hence lead to significant disruption of neuronal function. (One can always postulate that an anesthetic effect, however small, may have some profound physiologic consequence.) Recent evidence on the effects

of anesthetics on neurotransmitter release, however, suggests the chain of events underlying presynaptic neurotransmitter release can be relatively insensitive to anesthetics.<sup>30</sup> Overall, we believe, the contrasting, very much greater anesthetic sensitivity of certain ligand-gated ion channels<sup>30</sup> makes these, rather than voltage-gated  $Ca^{2+}$  channels, the most attractive candidates for major anesthetic targets. In conclusion, inhibition of voltage-gated P-type  $Ca^{2+}$  channels plays, at most, a supporting role, as opposed to a primary role, in the induction of general anesthesia.

The authors thank Dr. Robert Dickinson for help with the gas chromatography and Zeneca Pharmaceuticals for supplying the pure 2,6-diisopropylphenol.

## References

1. Bean BP: Classes of calcium channels in vertebrate cells. *Ann Rev Physiol* 51:367–384, 1989
2. Tsien RW, Ellinor PT, Horne WA: Molecular diversity of voltage-dependent  $Ca^{2+}$  channels. *Trends Pharmacol Sci* 12:349–354, 1991
3. Llinás R, Sugimori M, Hillman DE, Cherksey B: Distribution and functional significance of the P-type, voltage-dependent  $Ca^{2+}$  channels in the mammalian central nervous system. *Trends Neurosci* 15:351–355, 1992
4. Krizanov O, Diebold R, Lory P, Schwartz A: Molecular aspects and diversity of voltage-dependent calcium channels. *Circulation* 87(suppl 7):44–48, 1993
5. Terrar DA, Victory JGG: Isoflurane depresses membrane currents associated with contraction in myocytes isolated from guinea-pig ventricle. *ANESTHESIOLOGY* 69:742–749, 1988
6. Terrar DA, Victory JGG: Effects of halothane on membrane currents associated with contraction in single myocytes isolated from guinea-pig ventricle. *Br J Pharmacol* 94:500–508, 1988
7. Kress HG, Müller J, Eisert A, Gilge U, Tas PW, Koschel K: Effects of volatile anesthetics on cytoplasmic  $Ca^{2+}$  signaling and transmitter release in a neural cell line. *ANESTHESIOLOGY* 74:309–319, 1991
8. Eskinder H, Rusch NJ, Supan FD, Kampine JP, Bosnjak ZJ: The effects of volatile anesthetics on L- and T-type calcium channel currents in canine cardiac Purkinje cells. *ANESTHESIOLOGY* 74:919–926, 1991
9. Herrington J, Stern RC, Evers AS, Lingle CJ: Halothane inhibits two components of calcium current in clonal (GH<sub>3</sub>) pituitary cells. *J Neurosci* 11:2226–2240, 1991
10. Takenoshita M, Steinbach JH: Halothane blocks low-voltage-activated calcium current in rat sensory neurons. *J Neurosci* 11:1404–1412, 1991
11. Bosnjak ZJ, Supan FD, Rusch NJ: The effects of halothane, enflurane, and isoflurane on calcium current in isolated canine ventricular cells. *ANESTHESIOLOGY* 74:340–345, 1991
12. Gundersen CB, Umbach JA, Swartz BE: Barbiturates depress currents through human brain calcium channels studied in *Xenopus* oocytes. *J Pharmacol Exp Ther* 247:824–829, 1988
13. Gross RA, Macdonald RL: Differential actions of pentobarbition on calcium current components of mouse sensory neurones in culture. *J Physiol (Lond)* 405:187–203, 1988

## CALCIUM CHANNELS AND GENERAL ANESTHETICS

14. Takahashi T, Momiyama A: Different types of calcium channels mediate central synaptic transmission. *Nature* 366:156–158, 1993
15. Llinás R, Sugimori M, Lin J-W, Cherksey B: Blocking and isolation of a calcium channel from neurons in mammals and cephalopods utilizing a toxin fraction (FTX) from funnel-web spider poison. *Proc Natl Acad Sci USA* 86:1689–1693, 1989
16. Hillman D, Chen S, Aung TT, Cherksey B, Sugimori M, Llinás RR: Localization of P-type calcium channels in the central nervous system. *Proc Natl Acad Sci USA* 88:7076–7080, 1991
17. Uchitel OD, Protti DA, Sanchez V, Cherksey BD, Sugimori M, Llinás R: P-type voltage-dependent calcium channel mediates pre-synaptic calcium influx and transmitter release in mammalian synapses. *Proc Natl Acad Sci USA* 89:3330–3333, 1992
18. Mintz IM, Venema VJ, Swiderek KM, Lee TD, Bean BP, Adams ME: P-type calcium channels blocked by the spider toxin  $\omega$ -Aga-IVA. *Nature* 355:827–829, 1992
19. Mintz IM, Adams ME, Bean BP: P-type calcium channels in rat central and peripheral neurons. *Neuron* 9:85–95, 1992
20. Regan LJ: Voltage-dependent calcium currents in Purkinje cells from rat cerebellar vermis. *J Neurosci* 11:2259–2269, 1991
21. Hamill OP, Marty A, Neher E, Sakmann B, Sigworth FJ: Improved patch-clamp techniques for high-resolution current recording from cells and cell-free membrane patches. *Pflügers Arch* 391:85–100, 1981
22. Mintz IM, Bean BP: Block of calcium channels in rat neurons by synthetic  $\omega$ -Aga-IVA. *Neuropharmacol* 32:1161–1169, 1993
23. Raventós J: The action of Fluothane—a new volatile anaesthetic. *Br J Pharmacol* 11:394–410, 1956
24. Franks NP, Lieb WR: Stereospecific effects of inhalational general anesthetic optical isomers on nerve ion channels. *Science* 254:427–430, 1991
25. Franks NP, Lieb WR: Selective actions of volatile general anaesthetics at molecular and cellular levels. *Br J Anaesth* 71:65–76, 1993
26. Vitez TS, White PF, Eger EI II: Effects of hypothermia on halothane MAC and isoflurane MAC in the rat. *ANESTHESIOLOGY* 41:80–81, 1974
27. Kita Y, Bennett LJ, Miller KW: The partial molar volumes of anesthetics in lipid bilayers. *Biochim Biophys Acta* 647:130–139, 1981
28. Firestone LL, Sauter J-F, Braswell LM, Miller KW: Actions of general anesthetics on acetylcholine receptor-rich membranes from *Torpedo californica*. *ANESTHESIOLOGY* 64:694–702, 1986
29. Servin F, Desmonts JM, Haberer JP, Cockshott ID, Plummer GF, Farinotti R: Pharmacokinetics and protein binding of propofol in patients with cirrhosis. *ANESTHESIOLOGY* 69:887–891, 1988
30. Franks NP, Lieb WR: Molecular and cellular mechanisms of general anaesthesia. *Nature* 367:607–614, 1994
31. Deitrich RA, Dunwiddie TV, Harris RA, Erwin VG: Mechanism of action of ethanol: Initial central nervous system actions. *Pharmacol Rev* 41:489–537, 1989
32. Puttick RM, Terrar DA: Effects of propofol and enflurane on action potentials, membrane currents and contraction of guinea-pig isolated ventricular myocytes. *Br J Pharmacol* 107:559–565, 1992
33. Nishi K, Oyama Y: Accelerating effects of pentobarbitone on the inactivation process of the calcium current in *Helix* neurones. *Br J Pharmacol* 79:645–654, 1983
34. Werz MA, Macdonald RL: Barbiturates decrease voltage-dependent calcium conductance of mouse neurons in dissociated cell culture. *Mol Pharmacol* 28:269–277, 1985
35. French-Mullen JMH, Barker JL, Rogawski MA: Calcium current block by (–)-pentobarbital, phenobarbital, and CHEB but not (+)-pentobarbital in acutely isolated hippocampal CA1 neurons: Comparison with effects on GABA-activated  $Cl^-$  current. *J Neurosci* 13:3211–3221, 1993
36. Hille B: Ionic channels of excitable membranes. 2nd edition. Sunderland, Sinauer Associates, 1992, pp 97–101
37. Llinás R, Sugimori M, Simon SM: Transmission by presynaptic spike-like depolarization in the squid giant synapse. *Proc Natl Acad Sci USA* 79:2415–2419, 1982
38. Mintz IM, Bean BP: GABA<sub>B</sub> receptor inhibition of P-type  $Ca^{2+}$  channels in central neurons. *Neuron* 10:889–898, 1993
39. Krnjević K, Puil E: Halothane suppresses slow inward currents in hippocampal slices. *Can J Physiol Pharmacol* 66:1570–1575, 1988
